# Supplementary material
Source: Springer Nature journal article supplement (https://www.springermedizin.de/resource/supplementary/12939_2013_463_MOESM1_ESM.pdf/9551226)
Supplement: MOESM1 [file 9551226]

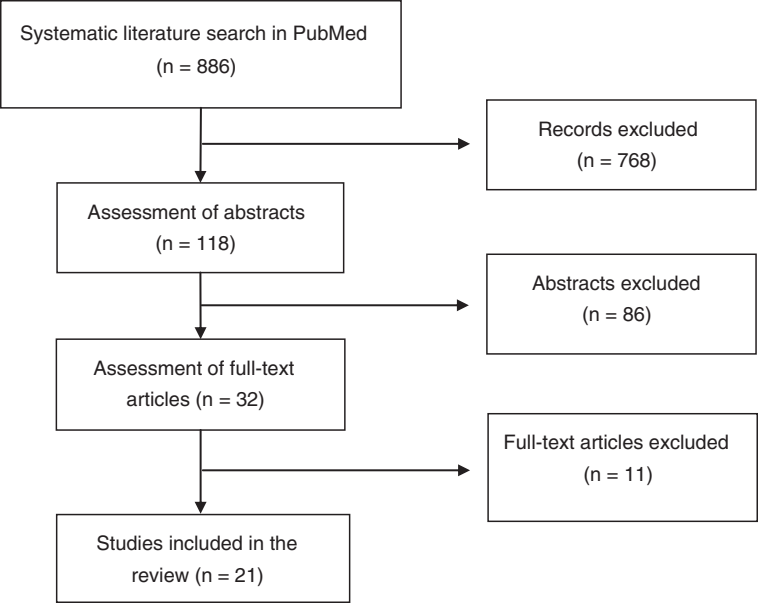

Systematic literature search in PubMed

(n = 886)

Assessment of abstracts

(n = 118)

Assessment of full-text

articles (n = 32)

Studies included in the

review (n = 21)

Records excluded

(n = 768)

Abstracts excluded

(n = 86)

Full-text articles excluded

(n = 11)
